# Supplementary material
Source: ML conference proceedings conference paper supplement (https://openreview.net/forum?id=g6iiIUvhko)
Supplement: supplementary_material [file attachment]

## A TRAINING APPROACH AND PSEUDOCODE

We utilize Proximal Policy Optimization (PPO) (Schulman et al., 2017) to train our policy network. PPO is an on-policy, actor-critic deep RL algorithm. The optimization objective for the policy is as follows:

$$\mathcal{L}_{\text{policy}}(\theta) = \mathbb{E} \left[ \min \left( r_t(\theta) \hat{A}_t, \text{clip} \left( r_t(\theta), 1 - \epsilon, 1 + \epsilon \right) \hat{A}_t \right) \right] \quad (9)$$

Here,  $\hat{A}_t$  denotes the estimation of the advantage function, and  $r_t(\theta)$  represents the probability ratio, defined as  $r_t(\theta) = \frac{\pi_{\theta}(a_t|s_t)}{\pi_{\theta_{\text{old}}}(a_t|s_t)}$ , where  $\pi_{\theta}$  represents the new policy and  $\pi_{\theta_{\text{old}}}$  represents the old policy.

In optimizing the conditional policy module, we utilize the  $\mathcal{L}_{\text{policy}}$  loss function. Notably, similar to the approach utilized in VariBAD (Zintgraf et al., 2019), the optimization of the task inference module does not rely on the  $\mathcal{L}_{\text{policy}}$  loss function. Instead, we adopt a composite loss function that combines reconstruction and contrastive learning objectives. The specific pseudo-code is shown in Algorithm 1.

---

### Algorithm 1 CFOHLR

---

**Require:** Encoder  $q_{\phi}$  and Decoder  $p_{\theta}$  of VAE; Coarse policy  $\pi_{\theta}$ ; Fine policy  $\pi_{\omega}$ ; Weight generator  $W_{\alpha}$  Skill-specific expert models  $\text{MoE}_{\theta_i}^{i=0,\dots,K}$ ; Hypernetworks  $H_{\phi}$ ; VAE buffer  $\mathcal{D}_{\text{VAE}}$ ; Policy buffer  $\mathcal{D}_{\text{Policy}}$ ; The number of meta-episodes  $n_{\text{meta}}$ ; The number of rollout episodes per meta-episode  $n_{\text{roll}}$ ; Language instruction  $\mathcal{U}$ .

**while**  $i=0,\dots,N_{\text{update}}$  **do**

    Sample  $K$  training tasks  $M_i^{i=0,\dots,K} \sim M_{\text{train}}$

**for** timestep  $t = 0,\dots,n_{\text{roll}} * H - 1$  **do**

**if**  $t \bmod H = 0$  **then**

            Reset rollout episode for each task, obtain  $S_t = \{s_{t,1}, s_{t,2}, \dots, s_{t,n}\}$

**end if**

**for**  $j=0,\dots,K$  **do**

            Obtain weights  $\alpha_{1,j}, \dots, \alpha_{K,j} = W_{\alpha}(\mathcal{U}_j)$  for each skill-specific expert module.

            Obtain the output of the coarse policy  $\pi_{\theta}$ , denoted as  $O_{\text{MOE}} = \sum_{i=0}^K \alpha_i \cdot \text{MoE}_{\theta_i}$ .

            Leverage  $H_{\phi}$  to generate the network parameters of the fine policy,  $\pi_{\omega} = H_{\phi}(z_t^j)$ .

            Obtain the action  $a_{t,j} = \pi_{\omega}(O_{\text{MOE}})$ .

**end for**

        Finally, obtain actions for each task  $A_t = \{a_{t,1}, a_{t,2}, \dots, a_{t,n}\}$ .

        Take an environment step, obtaining  $S_{t+1} = \{s_{t+1,1}, s_{t+1,2}, \dots, s_{t+1,n}\}$  and  $R_t = \{r_{t+1,1}, r_{t+1,2}, \dots, r_{t+1,n}\}$ .

        Add the transition  $(S_t, A_t, R_{t+1}, S_{t+1})$  to  $\mathcal{D}_{\text{VAE}}$  and  $\mathcal{D}_{\text{Policy}}$ .

        Update task representations  $Z_{t+1} = \{z_{t+1,n} = q_{\phi}(\tau_{t+1,n})\}_{i=0,\dots,n}$ .

**end for**

    Update VAE by minimizing  $\mathcal{L} = \mathcal{L}_{\text{VAE}} + \mathcal{L}_{\text{contra}}$

    Update policy  $\theta, \omega$  and weight generator  $\alpha$  by minimizing  $L_{\text{actor}} + L_{\text{critic}}$ .

**end while**

---

## B LIMITATIONS AND FUTURE WORK

Despite the significant progress, our method has limitations that were not addressed in this study. Notably, it is not directly applicable to the cross-entity adaptation problem, which involves generalizing a policy from one robotic entity to another. This limitation affects the overall generalizability of the policy. Future research will focus on tackling the challenge of cross-entity adaptation in a zero-shot manner, thereby enhancing the policy generalization.

## C IMPLEMENTATION DETAILS

### C.1 REFERENCE IMPLEMENTATIONS

**SDVT, LDM, and VariBAD** We adapt the SDVT (Lee et al., 2023), LDM (Lee & Chung, 2021), and VariBAD (Zintgraf et al., 2019) algorithms to the Meta-World benchmark. These algorithms are all based on the VariBAD method, which itself is grounded in the Bayesian Adaptive MDP (BAMDP) framework. VariBAD employs a VAE architecture consisting of a recurrent encoder and a dynamics decoder to obtain task representations. LDM introduces a virtual training procedure to VariBAD to address out-of-distribution challenges. Building on LDM, SDVT uses a Gaussian mixture distribution to model the latent space of the VAE. Notably, the virtual training steps of the LDM and SDVT methods are included in the total count of training steps, as these virtual processes necessitate agent interaction with the environment to obtain real states for generating imagined samples. We used open-source code to reproduce the results of the SDVT, LDM, and VariBAD methods, respectively, available at <https://github.com/suyoung-lee/SDVT>, <https://github.com/suyoung-lee/LDM>, and <https://github.com/lmzintgraf/varibad>.

**Million** Million (Bing et al., 2023) introduces a meta-RL paradigm comprising an instruction phase and a trial phase, integrating transformers with language instruction to improve task adaptation capabilities. We used open-source code to reproduce the results of the Million methods, respectively, available at <https://github.com/yaopt3/MILLION>.

### C.2 HYPERPARAMETERS

#### C.2.1 SDVT

We used the default hyperparameters from the paper, which are shown in Table 3.

#### C.2.2 LDM AND VARIBAD

We used the default hyperparameters from the paper, which are shown in Table 4.

#### C.2.3 MILLION

We used the default hyperparameters from the paper, which are shown in Table 5.

#### C.2.4 OURS

### C.3 NETWORK ARCHITECTURE

Our method utilizes a context-based architecture, comprising a task inference module and a conditional policy module. For the task inference module, similar to SDVT, we also employ a Gaussian mixture VAE to model the latent space. This module consists of an RNN-based encoder and a prediction decoder. Before being input into the encoder or decoder, all state, action, and reward inputs pass through embedding networks. Regarding the conditional policy module, it includes language-selected, skill-specific expert modules and a hypernetwork-based, task-aware policy. Similarly, before being input into the conditional policy module, all state, action, and reward inputs pass through embedding networks.

### C.4 TASK DESCRIPTIONS

In Table 11, we provide the language instructions for each of the 50 Meta-World tasks.

## D DETAILED EXPERIMENTAL RESULTS

We adhere to the success criterion established by Meta-World. A timestep is considered successful when the distance between the task-relevant object and the target falls within an acceptable range. Furthermore, an entire rollout episode is deemed successful if the agent achieves success at any timestep during the episode.

Table 3: Hyperparameters used for Garage experiments with SDVT

| Description                        | ML10               | ML45               |
|------------------------------------|--------------------|--------------------|
| Meta-Task Hyperparameters          |                    |                    |
| Meta-batch size                    | 10                 | 10                 |
| Tasks sampled per epoch            | 10                 | 10                 |
| General Hyperparameters            |                    |                    |
| Batch size                         | 1,000              | 1,000              |
| Path length per roll-out           | 1,000              | 1,000              |
| Discount factor                    | 0.99               | 0.99               |
| Algorithm-Specific Hyperparameters |                    |                    |
| Policy hidden sizes                | (256, 256)         | (256, 256)         |
| Activation function                | tanh               | tanh               |
| Policy learning rate               | $7 \times 10^{-4}$ | $7 \times 10^{-4}$ |
| PPO epochs num                     | 5                  | 5                  |
| VAE learning rate                  | $1 \times 10^{-3}$ | $1 \times 10^{-3}$ |
| Latent dimension                   | 5                  | 5                  |
| PPO num minibatches                | 10                 | 10                 |
| PPO clip param                     | 0.1                | 0.1                |
| Policy num steps                   | 5                  | 5                  |
| Size of VAE buffer                 | 1,000              | 1,000              |
| KL weight                          | 0.1                | 0.1                |
| VAE mixture num                    | 10                 | 10                 |
| Gaussian loss coefficient          | 1.0                | 1.0                |
| Action embedding size              | 16                 | 16                 |
| State embedding size               | 32                 | 32                 |
| Reward embedding size              | 16                 | 16                 |
| Virtual ratio increment            | 0.05               | 0.05               |
| Number of virtual skills           | 3                  | 3                  |
| RL loss through encoder            | False              | False              |
| VAE loss coefficient               | 1.0                | 1.0                |

## D.1 PERFORMANCE ON INDIVIDUAL TASKS

### D.1.1 ML-10

### D.1.2 ML-45

## D.2 LEARNING CURVES

In Figure 5, we present the mean and standard deviation of returns and success rates across five random seeds.

## E ADDITIONAL RESULTS

### E.1 VISULIZATIONS

To demonstrate the quality of the learned task representations, we employed t-SNE Van der Maaten & Hinton (2008) to map the task representation vectors into a 2D space, enabling the visualization of these representations. For each testing task, 150 transitions from the meta-testing phase were sampled to visualize the task representations. As depicted in Figure 6, our method effectively distinguishes task representations from different categories, with additional separation observed among tasks within the same category.

Table 4: The hyperparameters used in experiments with LDM and VariBAD are consistent across both models in the general and policy categories of SDVT, as outlined in Table 3. The only difference lies in the modeling of the latent space: SDVT utilizes a Gaussian mixture model, while both LDM and VariBAD employ a Gaussian model.

| Description                        | ML10               | ML45               |
|------------------------------------|--------------------|--------------------|
| Meta-Task Hyperparameters          |                    |                    |
| Meta-batch size                    | 10                 | 10                 |
| Tasks sampled per epoch            | 10                 | 10                 |
| General Hyperparameters            |                    |                    |
| Batch size                         | 1,000              | 1,000              |
| Path length per roll-out           | 1,000              | 1,000              |
| Discount factor                    | 0.99               | 0.99               |
| Algorithm-Specific Hyperparameters |                    |                    |
| VAE learning rate                  | $1 \times 10^{-3}$ | $1 \times 10^{-3}$ |
| Latent dimension                   | 5                  | 5                  |
| Size of VAE buffer                 | 1,000              | 1,000              |
| KL weight                          | 0.1                | 0.1                |
| Gaussian loss coefficient          | 1.0                | 1.0                |
| VAE loss coefficient               | 1.0                | 1.0                |

Table 5: Hyperparameters used in experiments with Million.

| Description                        | ML10               | ML45               |
|------------------------------------|--------------------|--------------------|
| Meta-Task Hyperparameters          |                    |                    |
| Meta-batch size                    | 10                 | 10                 |
| Tasks sampled per epoch            | 10                 | 10                 |
| General Hyperparameters            |                    |                    |
| Batch Timesteps                    | 1,000              | 1,000              |
| Action repeat                      | 1,000              | 1,000              |
| Demonstration action repeat        | 1,000              | 1,000              |
| Max trials per episode             | 750                | 750                |
| Discount factor                    | 0.99               | 0.99               |
| Algorithm-Specific Hyperparameters |                    |                    |
| Learning rate                      | $1e - 4$           | $1e - 4$           |
| GAE lambda                         | 0.97               | 0.97               |
| Epsilon eta                        | $1 \times 10^{-2}$ | $1 \times 10^{-2}$ |
| Epsilon alpha                      | $1 \times 10^{-2}$ | $1 \times 10^{-2}$ |
| Epsilon alpha mu                   | 0.0075             | 0.0075             |
| Epsilon alpha sigma                | $1e - 5$           | $1e - 5$           |

Table 6: Hyperparameters used in experiments with Ours.

| Description                        | ML10               | ML45               |
|------------------------------------|--------------------|--------------------|
| Meta-Task Hyperparameters          |                    |                    |
| Meta-batch size                    | 10                 | 10                 |
| Tasks sampled per epoch            | 10                 | 10                 |
| General Hyperparameters            |                    |                    |
| Batch size                         | 1,000              | 1,000              |
| Path length per roll-out           | 1000               |                    |
| Discount factor                    | 0.99               |                    |
| Algorithm-Specific Hyperparameters |                    |                    |
| Policy hidden sizes                | (256, 256)         | (256, 256)         |
| Activation function                | tanh               | tanh               |
| Policy learning rate               | $7 \times 10^{-4}$ | $7 \times 10^{-4}$ |
| PPO epochs num                     | 5                  | 5                  |
| VAE learning rate                  | $1 \times 10^{-3}$ | $1 \times 10^{-3}$ |
| Latent dimension                   | 5                  | 5                  |
| PPO num minibatches                | 10                 | 10                 |
| PPO clip param                     | 0.1                | 0.1                |
| Policy num steps                   | 5                  | 5                  |
| RL loss through encoder            | False              | False              |
| Action embedding size              | 16                 | 16                 |
| State embedding size               | 32                 | 32                 |
| Reward embedding size              | 16                 | 16                 |
| Size of VAE buffer                 | 1,000              | 1,000              |
| KL weight                          | 0.1                | 0.1                |
| VAE mixture num                    | 10                 | 10                 |
| Gaussian loss coefficient          | 1.0                | 1.0                |
| VAE loss coefficient               | 1.0                | 1.0                |
| Decode reward                      | True               | True               |
| Decode state                       | True               | True               |
| Weight of holistic                 | 0.01               | 0.01               |
| Weight of local contrastive        | 0.01               | 0.01               |

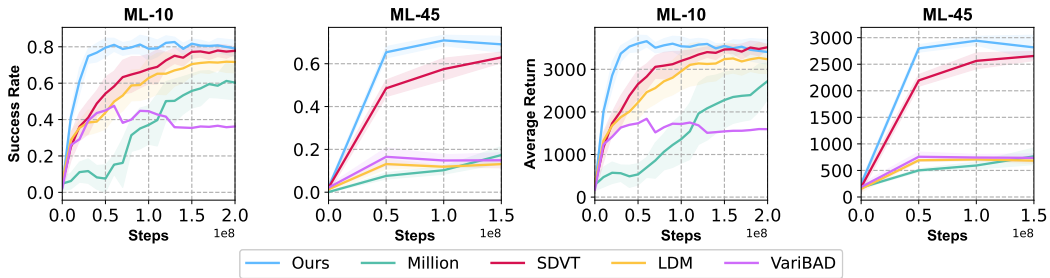

Figure 5: **Learning Curves on ML-10 and ML-45.** The maximum success rates and corresponding returns of our methods, along with baseline comparisons, are presented. The plot shows the mean and standard deviation of returns across five random seeds.

Table 7: ML-10 of Meta-World success rate (%). We present the final success rates of our method and baseline approaches on both the training and test tasks of the Meta-World ML-10 benchmark. All results are reported as the mean success rate  $\pm 95\%$  confidence interval of five seeds.

| Index. Task        | Ours                           | w/o C2F                         | w/o HLC                         | SDVT                            | Million                        | LDM                             | VariBAD                         |
|--------------------|--------------------------------|---------------------------------|---------------------------------|---------------------------------|--------------------------------|---------------------------------|---------------------------------|
| 1. Reach           | <b>85.2<math>\pm</math>3.6</b> | 53.2 $\pm$ 4.6                  | 44.0 $\pm$ 7.3                  | 53.6 $\pm$ 14.4                 | 10.4 $\pm$ 11.3                | 50.4 $\pm$ 7.9                  | 78.0 $\pm$ 5.7                  |
| 2. Push            | <b>86.0<math>\pm</math>3.0</b> | 70.4 $\pm$ 9.8                  | 74.8 $\pm$ 3.0                  | 74.0 $\pm$ 3.8                  | 44.5 $\pm$ 17.8                | 31.2 $\pm$ 11.2                 | 2.4 $\pm$ 2.0                   |
| 3. Pick-place      | <b>85.2<math>\pm</math>4.5</b> | 66.0 $\pm$ 6.9                  | 66.0 $\pm$ 2.9                  | 53.2 $\pm$ 6.0                  | 48.1 $\pm$ 29.8                | 37.2 $\pm$ 20.0                 | 0.8 $\pm$ 0.7                   |
| 4. Door-open       | 81.2 $\pm$ 1.9                 | 99.6 $\pm$ 0.6                  | 97.2 $\pm$ 3.9                  | <b>100.0<math>\pm</math>0.0</b> | 81.1 $\pm$ 25.1                | 99.6 $\pm$ 0.6                  | 74.8 $\pm$ 25.4                 |
| 5. Drawer-close    | 86.8 $\pm$ 1.4                 | <b>100.0<math>\pm</math>0.0</b> | <b>100.0<math>\pm</math>0.0</b> | <b>100.0<math>\pm</math>0.0</b> | 56.1 $\pm$ 32.1                | <b>100.0<math>\pm</math>0.0</b> | <b>100.0<math>\pm</math>0.0</b> |
| 6. Button-press    | 84.4 $\pm$ 3.1                 | <b>100.0<math>\pm</math>0.0</b> | <b>100.0<math>\pm</math>0.0</b> | 99.6 $\pm$ 0.6                  | 80.0 $\pm$ 27.7                | 98.4 $\pm$ 1.0                  | 88.4 $\pm$ 4.1                  |
| 7. Peg-insert-side | <b>88.0<math>\pm</math>2.5</b> | 48.8 $\pm$ 18.6                 | 62.0 $\pm$ 13.1                 | 52.0 $\pm$ 5.0                  | 21.5 $\pm$ 18.3                | 26.4 $\pm$ 15.3                 | 0.0 $\pm$ 0.0                   |
| 8. Window-open     | 86.4 $\pm$ 4.4                 | 99.6 $\pm$ 0.6                  | <b>100.0<math>\pm</math>0.0</b> | <b>100.0<math>\pm</math>0.0</b> | 80.0 $\pm$ 27.7                | 99.6 $\pm$ 0.6                  | 96.8 $\pm$ 1.1                  |
| 9. Sweep           | 89.6 $\pm$ 2.7                 | <b>93.2<math>\pm</math>2.1</b>  | <b>93.2<math>\pm</math>3.5</b>  | 89.2 $\pm$ 3.8                  | 77.6 $\pm$ 24.0                | 92.4 $\pm$ 3.3                  | 0.0 $\pm$ 0.0                   |
| 10. Basketball     | 82.8 $\pm$ 4.5                 | <b>93.6<math>\pm</math>4.0</b>  | 92.0 $\pm$ 5.6                  | 72.8 $\pm$ 15.5                 | 36.1 $\pm$ 31.0                | 89.2 $\pm$ 4.0                  | 0.0 $\pm$ 0.0                   |
| <b>Train mean</b>  | <b>85.6<math>\pm</math>3.9</b> | 82.4 $\pm$ 7.7                  | 82.9 $\pm$ 4.8                  | 79.4 $\pm$ 7.1                  | 53.5 $\pm$ 40.0                | 72.4 $\pm$ 11.4                 | 44.1 $\pm$ 7.9                  |
| 11. Drawer-open    | 86.4 $\pm$ 3.4                 | 78.0 $\pm$ 24.1                 | 80.0 $\pm$ 12.6                 | 72.8 $\pm$ 28.5                 | 0.0 $\pm$ 0.0                  | <b>92.8<math>\pm</math>8.1</b>  | 51.6 $\pm$ 21.1                 |
| 12. Door-close     | 87.2 $\pm$ 3.8                 | 74.4 $\pm$ 25.7                 | 81.6 $\pm$ 15.7                 | 76.4 $\pm$ 19.7                 | <b>97.5<math>\pm</math>2.8</b> | 26.0 $\pm$ 37.7                 | 71.6 $\pm$ 22.4                 |
| 13. Shelf-place    | <b>82.4<math>\pm</math>5.5</b> | 1.6 $\pm$ 3.1                   | 0.4 $\pm$ 0.8                   | 0.0 $\pm$ 0.0                   | 0.3 $\pm$ 0.5                  | 0.4 $\pm$ 0.8                   | 0.0 $\pm$ 0.0                   |
| 14. Sweep-into     | <b>90.0<math>\pm</math>5.1</b> | 67.6 $\pm$ 34.0                 | 82.8 $\pm$ 8.8                  | 64.8 $\pm$ 12.2                 | 17.5 $\pm$ 5.0                 | 57.6 $\pm$ 31.9                 | 4.8 $\pm$ 3.2                   |
| 15. Lever-pull     | <b>82.4<math>\pm</math>3.4</b> | 5.2 $\pm$ 7.4                   | 0.4 $\pm$ 0.8                   | 3.2 $\pm$ 3.2                   | 13.7 $\pm$ 26.9                | 0.4 $\pm$ 0.8                   | 0.4 $\pm$ 0.8                   |
| <b>Test mean</b>   | <b>85.7<math>\pm</math>4.9</b> | 45.4 $\pm$ 13.7                 | 49.0 $\pm$ 5.5                  | 43.4 $\pm$ 9.4                  | 25.8 $\pm$ 9.1                 | 35.4 $\pm$ 17.1                 | 25.7 $\pm$ 7.5                  |

Table 8: ML-10 of Meta-World returns. We present the performance metrics of our method and baseline approaches on both the training and test tasks of the Meta-World ML-10 benchmark. All results are reported as the mean return  $\pm 95\%$  confidence interval of five seeds.

| Index. Task        | Ours                           | w/o C2F                        | w/o HLC        | SDVT                          | Million         | LDM                           | VariBAD        |
|--------------------|--------------------------------|--------------------------------|----------------|-------------------------------|-----------------|-------------------------------|----------------|
| 1. Reach           | 3704 $\pm$ 149                 | <b>3778<math>\pm</math>128</b> | 3520 $\pm$ 141 | 3763 $\pm$ 296                | 2324 $\pm$ 447  | 3668 $\pm$ 285                | 4054 $\pm$ 138 |
| 2. Push            | <b>3769<math>\pm</math>135</b> | 3338 $\pm$ 342                 | 4094 $\pm$ 90  | 3675 $\pm$ 272                | 2225 $\pm$ 750  | 1795 $\pm$ 812                | 63 $\pm$ 28    |
| 3. Pick-place      | <b>3742<math>\pm</math>127</b> | 2089 $\pm$ 254                 | 2420 $\pm$ 116 | 1712 $\pm$ 125                | 1678 $\pm$ 803  | 1258 $\pm$ 709                | 7 $\pm$ 1      |
| 4. Door-open       | 3740 $\pm$ 91                  | 4503 $\pm$ 51                  | 4313 $\pm$ 78  | 4439 $\pm$ 26                 | 2790 $\pm$ 980  | <b>4442<math>\pm</math>47</b> | 2978 $\pm$ 470 |
| 5. Drawer-close    | 3708 $\pm$ 75                  | <b>4857<math>\pm</math>7</b>   | 4811 $\pm$ 30  | 4852 $\pm$ 10                 | 2505 $\pm$ 1302 | 4809 $\pm$ 67                 | 4637 $\pm$ 77  |
| 6. Button-press    | 3622 $\pm$ 144                 | 3489 $\pm$ 93                  | 3250 $\pm$ 108 | <b>3372<math>\pm</math>60</b> | 1337 $\pm$ 734  | 3226 $\pm$ 60                 | 2028 $\pm$ 155 |
| 7. Peg-insert-side | <b>3703<math>\pm</math>113</b> | 2359 $\pm$ 678                 | 2827 $\pm$ 421 | 2443 $\pm$ 266                | 1179 $\pm$ 697  | 1364 $\pm$ 773                | 9 $\pm$ 1      |
| 8. Window-open     | 3787 $\pm$ 157                 | <b>4479<math>\pm</math>49</b>  | 4398 $\pm$ 49  | 4476 $\pm$ 51                 | 2331 $\pm$ 942  | 4384 $\pm$ 61                 | 3692 $\pm$ 202 |
| 9. Sweep           | 3786 $\pm$ 147                 | <b>4093<math>\pm</math>85</b>  | 3963 $\pm$ 100 | 3801 $\pm$ 208                | 2849 $\pm$ 932  | 3997 $\pm$ 189                | 92 $\pm$ 28    |
| 10. Basketball     | <b>3705<math>\pm</math>185</b> | 3532 $\pm$ 196                 | 3576 $\pm$ 202 | 2937 $\pm$ 618                | 1624 $\pm$ 774  | 3433 $\pm$ 196                | 9 $\pm$ 2      |
| <b>Train mean</b>  | <b>3727<math>\pm</math>221</b> | 3652 $\pm$ 289                 | 3717 $\pm$ 112 | 3547 $\pm$ 203                | 2084 $\pm$ 1365 | 3238 $\pm$ 613                | 1757 $\pm$ 178 |
| 11. Drawer-open    | <b>3796<math>\pm</math>112</b> | 2477 $\pm$ 393                 | 2477 $\pm$ 190 | 2660 $\pm$ 396                | 1876 $\pm$ 384  | 2697 $\pm$ 475                | 2036 $\pm$ 329 |
| 12. Door-close     | <b>3740<math>\pm</math>119</b> | 2489 $\pm$ 566                 | 2887 $\pm$ 769 | 3087 $\pm$ 944                | 3302 $\pm$ 415  | 1272 $\pm$ 1538               | 2113 $\pm$ 558 |
| 13. Shelf-place    | <b>3746<math>\pm</math>157</b> | 492 $\pm$ 246                  | 607 $\pm$ 115  | 341 $\pm$ 99                  | 141 $\pm$ 204   | 309 $\pm$ 272                 | 0 $\pm$ 0      |
| 14. Sweep-into     | <b>3751<math>\pm</math>128</b> | 1619 $\pm$ 786                 | 1705 $\pm$ 434 | 1444 $\pm$ 564                | 716 $\pm$ 264   | 1200 $\pm$ 793                | 172 $\pm$ 96   |
| 15. Lever-pull     | <b>3634<math>\pm</math>197</b> | 305 $\pm$ 44                   | 251 $\pm$ 29   | 285 $\pm$ 60                  | 208 $\pm$ 44    | 278 $\pm$ 59                  | 324 $\pm$ 41   |
| <b>Test mean</b>   | <b>3734<math>\pm</math>165</b> | 1476 $\pm$ 224                 | 1585 $\pm$ 290 | 1563 $\pm$ 418                | 1249 $\pm$ 205  | 1151 $\pm$ 692                | 929 $\pm$ 208  |

Table 9: ML-45 of Meta-World success rate (%). We present the final success rates of our method and baseline approaches on both the training and test tasks of the Meta-World ML-45 benchmark. All results are reported as the mean success rate  $\pm 95\%$  confidence interval of five seeds.

| Index. Task                  | Ours                           | w/o C2F                         | w/o HLC                         | SDVT                            | Million                         | LDM             | VariBAD                         |
|------------------------------|--------------------------------|---------------------------------|---------------------------------|---------------------------------|---------------------------------|-----------------|---------------------------------|
| 1. Assembly                  | <b>68.0<math>\pm</math>2.0</b> | 0.5 $\pm$ 0.3                   | 0.5 $\pm$ 0.3                   | 0.5 $\pm$ 0.3                   | 0.0 $\pm$ 0.0                   | 0.0 $\pm$ 0.0   | 0.0 $\pm$ 0.0                   |
| 2. Basketball                | <b>67.5<math>\pm</math>1.3</b> | 22.0 $\pm$ 5.7                  | 21.5 $\pm$ 1.7                  | 38.0 $\pm$ 5.2                  | 0.0 $\pm$ 0.0                   | 0.0 $\pm$ 0.0   | 0.0 $\pm$ 0.0                   |
| 3. Button-press-topdown      | 65.0 $\pm$ 3.2                 | <b>99.0<math>\pm</math>0.6</b>  | 98.5 $\pm$ 0.3                  | 98.0 $\pm$ 0.7                  | 0.0 $\pm$ 0.0                   | 9.5 $\pm$ 2.8   | 27.5 $\pm$ 6.7                  |
| 4. Button-press-topdown-wall | 72.0 $\pm$ 2.3                 | 96.0 $\pm$ 2.3                  | 98.5 $\pm$ 0.6                  | <b>99.0<math>\pm</math>0.3</b>  | 0.0 $\pm$ 0.0                   | 9.5 $\pm$ 2.7   | 17.0 $\pm$ 4.6                  |
| 5. Button-press-wall         | 75.5 $\pm$ 3.0                 | 94.0 $\pm$ 2.1                  | 95.0 $\pm$ 1.8                  | <b>100.0<math>\pm</math>0.0</b> | 43.2 $\pm$ 10.8                 | 30.0 $\pm$ 3.9  | 27.0 $\pm$ 6.1                  |
| 6. Button-press-wall         | 71.0 $\pm$ 2.4                 | <b>88.0<math>\pm</math>3.1</b>  | 76.0 $\pm$ 4.8                  | 80.5 $\pm$ 4.2                  | 49.2 $\pm$ 6.0                  | 41.0 $\pm$ 9.7  | 32.0 $\pm$ 4.8                  |
| 7. Coffee-button             | 65.0 $\pm$ 2.8                 | <b>100.0<math>\pm</math>0.0</b> | <b>100.0<math>\pm</math>0.0</b> | 98.5 $\pm$ 0.9                  | 42.3 $\pm$ 14.7                 | 55.5 $\pm$ 11.0 | 33.5 $\pm$ 8.7                  |
| 8. Coffee-pull               | <b>73.5<math>\pm</math>2.9</b> | 62.5 $\pm$ 1.3                  | 70.0 $\pm$ 3.6                  | 37.0 $\pm$ 5.8                  | 0.2 $\pm$ 0.1                   | 1.0 $\pm$ 0.3   | 0.0 $\pm$ 0.0                   |
| 9. Coffee-push               | <b>76.5<math>\pm</math>1.5</b> | 57.5 $\pm$ 10.7                 | 69.5 $\pm$ 5.5                  | 37.5 $\pm$ 4.9                  | 30.8 $\pm$ 9.7                  | 11.5 $\pm$ 3.3  | 7.5 $\pm$ 2.1                   |
| 10. Dial-turn                | 73.5 $\pm$ 2.6                 | 73.0 $\pm$ 6.1                  | 75.0 $\pm$ 4.9                  | <b>77.5<math>\pm</math>2.6</b>  | 62.2 $\pm$ 2.4                  | 8.5 $\pm$ 1.7   | 26.0 $\pm$ 6.4                  |
| 11. Disassemble              | 74.0 $\pm$ 3.2                 | 69.5 $\pm$ 13.6                 | <b>79.0<math>\pm</math>5.3</b>  | 78.0 $\pm$ 4.3                  | 0.0 $\pm$ 0.0                   | 0.5 $\pm$ 0.3   | 4.5 $\pm$ 2.6                   |
| 12. Door-close               | 72.5 $\pm$ 1.3                 | <b>100.0<math>\pm</math>0.0</b> | 99.5 $\pm$ 0.3                  | 100.0 $\pm$ 0.0                 | 51.0 $\pm$ 11.9                 | 98.5 $\pm$ 0.9  | 65.0 $\pm$ 13.8                 |
| 13. Door-open                | 74.5 $\pm$ 2.8                 | 92.0 $\pm$ 3.3                  | 94.0 $\pm$ 2.7                  | <b>95.5<math>\pm</math>0.9</b>  | 0.0 $\pm$ 0.0                   | 0.0 $\pm$ 0.0   | 0.0 $\pm$ 0.0                   |
| 14. Drawer-close             | 70.5 $\pm$ 1.7                 | 96.0 $\pm$ 1.4                  | <b>100.0<math>\pm</math>0.0</b> | 99.5 $\pm$ 0.3                  | <b>100.0<math>\pm</math>0.0</b> | 99.0 $\pm$ 0.6  | <b>100.0<math>\pm</math>0.0</b> |
| 15. Drawer-open              | 68.0 $\pm$ 2.4                 | <b>99.5<math>\pm</math>0.3</b>  | 95.0 $\pm$ 1.5                  | 98.5 $\pm$ 0.6                  | 0.0 $\pm$ 0.0                   | 15.0 $\pm$ 6.1  | 10.0 $\pm$ 2.4                  |
| 16. Faucet-open              | 71.0 $\pm$ 2.7                 | 98.0 $\pm$ 0.5                  | 96.0 $\pm$ 2.0                  | <b>98.5<math>\pm</math>0.9</b>  | 11.2 $\pm$ 3.8                  | 30.5 $\pm$ 1.5  | 54.0 $\pm$ 9.7                  |
| 17. Faucet-close             | 77.0 $\pm$ 1.0                 | 98.5 $\pm$ 0.9                  | 87.5 $\pm$ 3.8                  | <b>99.5<math>\pm</math>0.3</b>  | 42.0 $\pm$ 13.5                 | 22.0 $\pm$ 4.4  | 28.5 $\pm$ 7.1                  |
| 18. Hammer                   | <b>75.5<math>\pm</math>1.5</b> | 8.5 $\pm$ 5.0                   | 33.0 $\pm$ 11.1                 | 0.0 $\pm$ 0.0                   | 12.2 $\pm$ 7.1                  | 1.5 $\pm$ 0.9   | 2.0 $\pm$ 0.8                   |
| 19. Handle-press-side        | 69.0 $\pm$ 1.4                 | <b>100.0<math>\pm</math>0.0</b> | 99.0 $\pm$ 0.6                  | <b>100.0<math>\pm</math>0.0</b> | 14.2 $\pm$ 4.9                  | 6.0 $\pm$ 2.2   | 38.5 $\pm$ 8.5                  |
| 20. Handle-press             | 70.0 $\pm$ 1.3                 | <b>100.0<math>\pm</math>0.0</b> | 99.5 $\pm$ 0.3                  | <b>100.0<math>\pm</math>0.0</b> | 65.5 $\pm$ 3.2                  | 45.5 $\pm$ 2.9  | 57.0 $\pm$ 2.5                  |
| 21. Handle-pull-side         | 72.5 $\pm$ 3.0                 | 96.0 $\pm$ 2.0                  | <b>98.0<math>\pm</math>1.2</b>  | 89.5 $\pm$ 3.6                  | 17.7 $\pm$ 4.6                  | 0.0 $\pm$ 0.0   | 1.5 $\pm$ 0.6                   |
| 22. Handle-pull              | 70.5 $\pm$ 1.9                 | 76.5 $\pm$ 13.3                 | <b>99.5<math>\pm</math>0.3</b>  | 63.5 $\pm$ 12.2                 | 27.0 $\pm$ 10.1                 | 1.5 $\pm$ 0.3   | 1.0 $\pm$ 0.6                   |
| 23. Lever-pull               | <b>76.5<math>\pm</math>1.2</b> | 55.5 $\pm$ 9.6                  | 9.5 $\pm$ 5.6                   | 52.0 $\pm$ 10.4                 | 0.0 $\pm$ 0.0                   | 0.0 $\pm$ 0.0   | 1.5 $\pm$ 0.3                   |
| 24. Peg-insert-side          | <b>72.0<math>\pm</math>1.7</b> | 9.0 $\pm$ 1.1                   | 33.5 $\pm$ 2.5                  | 3.5 $\pm$ 0.6                   | 0.0 $\pm$ 0.0                   | 0.0 $\pm$ 0.0   | 0.0 $\pm$ 0.0                   |
| 25. Pick-place-wall          | <b>72.0<math>\pm</math>1.1</b> | 61.5 $\pm$ 4.2                  | 59.5 $\pm$ 6.4                  | 46.0 $\pm$ 3.5                  | 13.5 $\pm$ 5.8                  | 0.0 $\pm$ 0.0   | 0.5 $\pm$ 0.3                   |
| 26. Pick-out-of-hole         | <b>67.0<math>\pm</math>3.6</b> | 39.0 $\pm$ 9.9                  | 52.0 $\pm$ 5.0                  | 53.5 $\pm$ 5.7                  | 0.0 $\pm$ 0.0                   | 0.0 $\pm$ 0.0   | 0.0 $\pm$ 0.0                   |
| 27. Push                     | <b>79.5<math>\pm</math>3.0</b> | 38.0 $\pm$ 3.0                  | 48.0 $\pm$ 2.2                  | 27.5 $\pm$ 3.2                  | 7.7 $\pm$ 2.9                   | 42.0 $\pm$ 3.8  | 46.0 $\pm$ 5.8                  |
| 28. Push-back                | 66.5 $\pm$ 1.9                 | 69.0 $\pm$ 5.7                  | <b>79.5<math>\pm</math>3.1</b>  | 64.0 $\pm$ 4.2                  | 0.0 $\pm$ 0.0                   | 0.0 $\pm$ 0.0   | 1.0 $\pm$ 0.6                   |
| 29. Push                     | <b>74.5<math>\pm</math>2.6</b> | 43.0 $\pm$ 4.2                  | 68.0 $\pm$ 4.9                  | 38.5 $\pm$ 7.5                  | 8.3 $\pm$ 2.4                   | 4.5 $\pm$ 1.0   | 3.0 $\pm$ 1.0                   |
| 30. Pick-place               | <b>67.5<math>\pm</math>1.2</b> | 50.5 $\pm$ 2.4                  | 58.5 $\pm$ 2.8                  | 47.5 $\pm$ 3.6                  | 10.3 $\pm$ 4.3                  | 0.0 $\pm$ 0.0   | 1.0 $\pm$ 0.3                   |
| 31. Plate-slide-side         | <b>69.0<math>\pm</math>2.8</b> | 47.5 $\pm$ 4.8                  | 48.0 $\pm$ 3.7                  | 67.0 $\pm$ 3.8                  | 36.7 $\pm$ 7.0                  | 0.0 $\pm$ 0.0   | 0.5 $\pm$ 0.3                   |
| 32. Plate-slide-side         | 71.0 $\pm$ 3.2                 | <b>95.0<math>\pm</math>1.0</b>  | 91.5 $\pm$ 2.2                  | 92.5 $\pm$ 2.3                  | 0.0 $\pm$ 0.0                   | 0.5 $\pm$ 0.3   | 13.5 $\pm$ 7.9                  |
| 33. Plate-slide back         | 67.5 $\pm$ 1.5                 | 96.5 $\pm$ 0.6                  | <b>98.5<math>\pm</math>0.9</b>  | 91.5 $\pm$ 1.5                  | 0.0 $\pm$ 0.0                   | 1.5 $\pm$ 0.6   | 4.5 $\pm$ 1.5                   |
| 34. Plate-slide-back-side    | 75.5 $\pm$ 2.4                 | 80.5 $\pm$ 5.1                  | <b>89.0<math>\pm</math>2.5</b>  | 83.5 $\pm$ 2.7                  | 0.0 $\pm$ 0.0                   | 0.5 $\pm$ 0.3   | 6.0 $\pm$ 2.0                   |
| 35. Peg-unplug-side          | 69.5 $\pm$ 1.7                 | 66.5 $\pm$ 3.7                  | <b>76.0<math>\pm</math>4.7</b>  | 53.5 $\pm$ 3.8                  | 5.3 $\pm$ 1.3                   | 6.5 $\pm$ 2.8   | 4.5 $\pm$ 1.5                   |
| 36. Soccer                   | <b>73.0<math>\pm</math>1.7</b> | 21.5 $\pm$ 4.8                  | 18.0 $\pm$ 1.2                  | 26.0 $\pm$ 2.4                  | 10.5 $\pm$ 2.1                  | 9.0 $\pm$ 2.2   | 8.0 $\pm$ 1.3                   |
| 37. Stick-push               | <b>72.0<math>\pm</math>1.4</b> | 0.0 $\pm$ 0.0                   | 0.0 $\pm$ 0.0                   | 0.0 $\pm$ 0.0                   | 0.0 $\pm$ 0.0                   | 0.0 $\pm$ 0.0   | 0.0 $\pm$ 0.0                   |
| 38. Stick-pull               | <b>73.5<math>\pm</math>1.9</b> | 0.0 $\pm$ 0.0                   | 0.5 $\pm$ 0.3                   | 0.0 $\pm$ 0.0                   | 0.0 $\pm$ 0.0                   | 0.0 $\pm$ 0.0   | 0.0 $\pm$ 0.0                   |
| 39. Push-wall                | <b>72.0<math>\pm</math>2.4</b> | 54.5 $\pm$ 6.4                  | 88.0 $\pm$ 1.1                  | 54.0 $\pm$ 10.0                 | 7.8 $\pm$ 3.1                   | 0.5 $\pm$ 0.3   | 1.0 $\pm$ 0.6                   |
| 40. Reach-wall               | <b>75.0<math>\pm</math>0.6</b> | 40.5 $\pm$ 6.9                  | 60.0 $\pm$ 4.1                  | 26.5 $\pm$ 6.1                  | 13.3 $\pm$ 5.3                  | 49.5 $\pm$ 5.6  | <b>75.0<math>\pm</math>5.2</b>  |
| 41. Shelf-place              | <b>74.5<math>\pm</math>2.5</b> | 6.0 $\pm$ 2.8                   | 1.0 $\pm$ 0.6                   | 1.0 $\pm$ 0.6                   | 0.8 $\pm$ 0.5                   | 0.0 $\pm$ 0.0   | 0.0 $\pm$ 0.0                   |
| 42. Sweep-into               | 66.0 $\pm$ 1.4                 | 94.5 $\pm$ 1.2                  | <b>95.5<math>\pm</math>1.3</b>  | 81.5 $\pm$ 8.1                  | 25.0 $\pm$ 4.7                  | 9.0 $\pm$ 1.9   | 11.0 $\pm$ 2.6                  |
| 43. Sweep                    | 73.0 $\pm$ 1.1                 | 74.5 $\pm$ 2.9                  | <b>83.0<math>\pm</math>3.6</b>  | 36.5 $\pm$ 12.3                 | 30.0 $\pm$ 0.0                  | 0.0 $\pm$ 0.0   | 0.0 $\pm$ 0.0                   |
| 44. Window-open              | 64.5 $\pm$ 0.7                 | <b>99.0<math>\pm</math>0.3</b>  | 98.5 $\pm$ 0.9                  | 100.0 $\pm$ 0.0                 | 0.60 $\pm$ 7.9                  | 13.5 $\pm$ 3.6  | 33.5 $\pm$ 6.2                  |
| 45. Window-close             | 67.0 $\pm$ 2.7                 | <b>100.0<math>\pm</math>0.0</b> | 99.5 $\pm$ 0.3                  | 99.5 $\pm$ 0.3                  | 11.8 $\pm$ 4.0                  | 17.0 $\pm$ 3.2  | 29.5 $\pm$ 8.0                  |
| <b>Train mean</b>            | <b>71.4<math>\pm</math>4.3</b> | 66.0 $\pm$ 5.8                  | 69.8 $\pm$ 4.1                  | 63.0 $\pm$ 5.5                  | 17.3 $\pm$ 8.9                  | 14.2 $\pm$ 2.6  | 17.2 $\pm$ 4.2                  |
| 46. Bin-picking              | <b>76.0<math>\pm</math>3.2</b> | 1.0 $\pm$ 1.0                   | 1.5 $\pm$ 0.9                   | 3.5 $\pm$ 2.6                   | 0.2 $\pm$ 0.3                   | 0.0 $\pm$ 0.0   | 0.0 $\pm$ 0.0                   |
| 47. Box-close                | <b>70.0<math>\pm</math>4.3</b> | 1.0 $\pm$ 1.0                   | 6.5 $\pm$ 3.9                   | 0.5 $\pm$ 0.9                   | 1.7 $\pm$ 2.9                   | 0.5 $\pm$ 0.9   | 0.5 $\pm$ 0.9                   |
| 48. Hand-insert              | <b>69.5<math>\pm</math>2.6</b> | 0.5 $\pm$ 0.9                   | 2.5 $\pm$ 2.6                   | 3.5 $\pm$ 3.6                   | 7.5 $\pm$ 7.7                   | 3.0 $\pm$ 3.4   | 3.0 $\pm$ 2.3                   |
| 49. Door-lock                | 73.0 $\pm$ 10.0                | <b>82.0<math>\pm</math>3.8</b>  | 70.0 $\pm$ 17.2                 | 61.5 $\pm$ 13.4                 | 34.3 $\pm$ 4.8                  | 41.5 $\pm$ 10.1 | 134.5 $\pm$ 12.6                |
| 50. Door-unlock              | 68.5 $\pm$ 3.6                 | 81.0 $\pm$ 7.1                  | <b>84.5<math>\pm</math>9.7</b>  | 66.0 $\pm$ 15.5                 | 14.2 $\pm$ 24.8                 | 21.0 $\pm$ 10.0 | 37.0 $\pm$ 15.0                 |
| <b>Test mean</b>             | <b>71.4<math>\pm</math>3.5</b> | 33.1 $\pm$ 3.0                  | 33.0 $\pm$ 6.3                  | 27.0 $\pm$ 8.9                  | 11.6 $\pm$ 7.1                  | 13.2 $\pm$ 6.0  | 15.0 $\pm$ 6.5                  |

Table 10: ML-45 of Meta-World returns. We present the final returns of our method and baseline approaches on both the training and test tasks of the Meta-World ML-45 benchmark. All results are reported as the mean return  $\pm 95\%$  confidence interval of five seeds.

| Index. Task                  | Ours                           | w/o<br>C2F                     | w/o<br>HLC                     | SDVT                           | Million        | LDM            | VariBAD        |
|------------------------------|--------------------------------|--------------------------------|--------------------------------|--------------------------------|----------------|----------------|----------------|
| 1. Assembly                  | <b>2898<math>\pm</math>97</b>  | 2847 $\pm$ 27                  | 2529 $\pm$ 88                  | 2590 $\pm$ 61                  | 329 $\pm$ 53   | 154 $\pm$ 27   | 101 $\pm$ 13   |
| 2. Basketball                | <b>2885<math>\pm</math>101</b> | 1417 $\pm$ 116                 | 1444 $\pm$ 107                 | 1569 $\pm$ 169                 | 281 $\pm$ 86   | 5 $\pm$ 0      | 11 $\pm$ 2     |
| 3. Button-press-topdown      | 2693 $\pm$ 116                 | 3582 $\pm$ 100                 | <b>3712<math>\pm</math>27</b>  | 3586 $\pm$ 50                  | 884 $\pm$ 128  | 988 $\pm$ 104  | 1182 $\pm$ 84  |
| 4. Button-press-topdown-wall | 2950 $\pm$ 69                  | 3541 $\pm$ 120                 | <b>3686<math>\pm</math>52</b>  | 3594 $\pm$ 62                  | 868 $\pm$ 132  | 977 $\pm$ 99   | 1209 $\pm$ 81  |
| 5. Button-press-wall         | 3186 $\pm$ 28                  | 3143 $\pm$ 111                 | 3072 $\pm$ 48                  | <b>3193<math>\pm</math>101</b> | 553 $\pm$ 102  | 667 $\pm$ 68   | 615 $\pm$ 96   |
| 6. Button-press-wall         | 3118 $\pm$ 73                  | <b>3344<math>\pm</math>108</b> | 3170 $\pm$ 64                  | 3275 $\pm$ 44                  | 495 $\pm$ 108  | 711 $\pm$ 156  | 633 $\pm$ 87   |
| 7. Coffee-button             | 2746 $\pm$ 53                  | <b>3465<math>\pm</math>71</b>  | 2731 $\pm$ 336                 | 3309 $\pm$ 96                  | 684 $\pm$ 249  | 204 $\pm$ 13   | 211 $\pm$ 25   |
| 8. Coffee-pull               | <b>3123<math>\pm</math>79</b>  | 1209 $\pm$ 45                  | 1385 $\pm$ 128                 | 877 $\pm$ 118                  | 58 $\pm$ 4     | 40 $\pm$ 2     | 40 $\pm$ 4     |
| 9. Coffee-push               | <b>3197<math>\pm</math>39</b>  | 1175 $\pm$ 203                 | 1463 $\pm$ 193                 | 729 $\pm$ 55                   | 228 $\pm$ 62   | 41 $\pm$ 4     | 65 $\pm$ 16    |
| 10. Dial-turn                | 2861 $\pm$ 70                  | <b>3711<math>\pm</math>134</b> | 3396 $\pm$ 108                 | 3607 $\pm$ 197                 | 670 $\pm$ 30   | 942 $\pm$ 98   | 803 $\pm$ 76   |
| 11. Disassemble              | <b>2990<math>\pm</math>85</b>  | 2823 $\pm$ 431                 | 2811 $\pm$ 291                 | 2878 $\pm$ 254                 | 124 $\pm$ 20   | 156 $\pm$ 11   | 130 $\pm$ 10   |
| 12. Door-close               | 2975 $\pm$ 93                  | 4310 $\pm$ 44                  | 4328 $\pm$ 63                  | <b>4481<math>\pm</math>19</b>  | 1138 $\pm$ 161 | 4359 $\pm$ 27  | 2661 $\pm$ 580 |
| 13. Door-open                | 3080 $\pm$ 50                  | 4004 $\pm$ 116                 | 3948 $\pm$ 76                  | <b>4010<math>\pm</math>109</b> | 636 $\pm$ 61   | 624 $\pm$ 76   | 607 $\pm$ 62   |
| 14. Drawer-close             | 2936 $\pm$ 35                  | 4443 $\pm$ 125                 | 4730 $\pm$ 28                  | <b>4748<math>\pm</math>22</b>  | 3625 $\pm$ 462 | 4375 $\pm$ 92  | 4482 $\pm$ 122 |
| 15. Drawer-open              | 2855 $\pm$ 112                 | 4638 $\pm$ 6                   | 4065 $\pm$ 99                  | <b>4391<math>\pm</math>14</b>  | 1746 $\pm$ 95  | 1284 $\pm$ 71  | 1356 $\pm$ 127 |
| 16. Faucet-open              | 2945 $\pm$ 94                  | 4608 $\pm$ 9                   | 4276 $\pm$ 158                 | <b>4636<math>\pm</math>17</b>  | 1669 $\pm$ 47  | 2212 $\pm$ 73  | 2584 $\pm$ 299 |
| 17. Faucet-close             | 3074 $\pm$ 23                  | <b>4594<math>\pm</math>31</b>  | 3997 $\pm$ 173                 | 4533 $\pm$ 42                  | 2349 $\pm$ 214 | 2193 $\pm$ 129 | 2174 $\pm$ 185 |
| 18. Hammer                   | <b>3013<math>\pm</math>68</b>  | 516 $\pm$ 28                   | 1299 $\pm$ 301                 | 468 $\pm$ 5                    | 563 $\pm$ 56   | 394 $\pm$ 27   | 397 $\pm$ 25   |
| 19. Handle-press-side        | 2949 $\pm$ 27                  | 4689 $\pm$ 52                  | 4707 $\pm$ 29                  | <b>4783<math>\pm</math>8</b>   | 480 $\pm$ 68   | 489 $\pm$ 71   | 1377 $\pm$ 270 |
| 20. Handle-press             | 2941 $\pm$ 53                  | <b>4648<math>\pm</math>66</b>  | 4601 $\pm$ 48                  | 4579 $\pm$ 64                  | 2063 $\pm$ 73  | 1791 $\pm$ 100 | 2126 $\pm$ 116 |
| 21. Handle-pull-side         | 2959 $\pm$ 56                  | <b>3647<math>\pm</math>143</b> | 3060 $\pm$ 275                 | 3340 $\pm$ 240                 | 165 $\pm$ 64   | 19 $\pm$ 2     | 24 $\pm$ 2     |
| 22. Handle-pull              | 3000 $\pm$ 83                  | 3482 $\pm$ 342                 | <b>4019<math>\pm</math>59</b>  | 2996 $\pm$ 260                 | 996 $\pm$ 392  | 40 $\pm$ 8     | 87 $\pm$ 23    |
| 23. Lever-pull               | <b>2999<math>\pm</math>46</b>  | 762 $\pm$ 79                   | 381 $\pm$ 33                   | 878 $\pm$ 89                   | 276 $\pm$ 13   | 240 $\pm$ 10   | 232 $\pm$ 11   |
| 24. Peg-insert-side          | <b>2978<math>\pm</math>42</b>  | 1307 $\pm$ 81                  | 1616 $\pm$ 128                 | 1238 $\pm$ 50                  | 192 $\pm$ 36   | 11 $\pm$ 0     | 10 $\pm$ 1     |
| 25. Pick-place-wall          | <b>3102<math>\pm</math>60</b>  | 2542 $\pm$ 157                 | 2728 $\pm$ 136                 | 1812 $\pm$ 98                  | 491 $\pm$ 181  | 0 $\pm$ 0      | 2 $\pm$ 0      |
| 26. Pick-out-of-hole         | <b>2808<math>\pm</math>91</b>  | 781 $\pm$ 183                  | 1206 $\pm$ 142                 | 922 $\pm$ 122                  | 23 $\pm$ 5     | 10 $\pm$ 1     | 13 $\pm$ 1     |
| 27. Push                     | 3157 $\pm$ 49                  | 2839 $\pm$ 131                 | <b>3313<math>\pm</math>108</b> | 2823 $\pm$ 142                 | 1555 $\pm$ 125 | 3105 $\pm$ 126 | 3193 $\pm$ 89  |
| 28. Push-back                | <b>2897<math>\pm</math>111</b> | 1284 $\pm$ 88                  | 1799 $\pm$ 66                  | 881 $\pm$ 203                  | 16 $\pm$ 2     | 7 $\pm$ 1      | 5 $\pm$ 0      |
| 29. Push                     | 3094 $\pm$ 115                 | 2428 $\pm$ 123                 | <b>3421<math>\pm</math>56</b>  | 2247 $\pm$ 92                  | 651 $\pm$ 156  | 55 $\pm$ 6     | 60 $\pm$ 8     |
| 30. Pick-place               | <b>2921<math>\pm</math>54</b>  | 1632 $\pm$ 76                  | 2165 $\pm$ 83                  | 1449 $\pm$ 141                 | 291 $\pm$ 115  | 8 $\pm$ 0      | 10 $\pm$ 1     |
| 31. Plate-slide-side         | 2942 $\pm$ 63                  | 2516 $\pm$ 138                 | 2207 $\pm$ 77                  | <b>3221<math>\pm</math>98</b>  | 1929 $\pm$ 195 | 359 $\pm$ 18   | 546 $\pm$ 40   |
| 32. Plate-slide-side         | 3022 $\pm$ 114                 | 3250 $\pm$ 84                  | 2873 $\pm$ 85                  | <b>3784<math>\pm</math>178</b> | 818 $\pm$ 54   | 191 $\pm$ 31   | 662 $\pm$ 139  |
| 33. Plate-slide back         | 2764 $\pm$ 46                  | <b>4235<math>\pm</math>28</b>  | 4109 $\pm$ 20                  | 4165 $\pm$ 52                  | 1021 $\pm$ 52  | 556 $\pm$ 15   | 561 $\pm$ 67   |
| 34. Plate-slide-back-side    | 3021 $\pm$ 29                  | 3776 $\pm$ 179                 | <b>4173<math>\pm</math>24</b>  | 4124 $\pm$ 58                  | 631 $\pm$ 142  | 183 $\pm$ 35   | 728 $\pm$ 134  |
| 35. Peg-unplug-side          | <b>2935<math>\pm</math>36</b>  | 1390 $\pm$ 217                 | 1984 $\pm$ 187                 | 890 $\pm$ 103                  | 43 $\pm$ 9     | 33 $\pm$ 3     | 27 $\pm$ 1     |
| 36. Soccer                   | <b>2974<math>\pm</math>67</b>  | 1056 $\pm$ 25                  | 1079 $\pm$ 41                  | 1052 $\pm$ 65                  | 515 $\pm$ 152  | 278 $\pm$ 30   | 321 $\pm$ 16   |
| 37. Stick-push               | <b>3074<math>\pm</math>21</b>  | 612 $\pm$ 206                  | 289 $\pm$ 166                  | 26 $\pm$ 8                     | 125 $\pm$ 28   | 11 $\pm$ 1     | 14 $\pm$ 2     |
| 38. Stick-pull               | <b>2980<math>\pm</math>88</b>  | 289 $\pm$ 92                   | 82 $\pm$ 43                    | 16 $\pm$ 3                     | 129 $\pm$ 37   | 11 $\pm$ 1     | 12 $\pm$ 1     |
| 39. Push-wall                | 2925 $\pm$ 74                  | 2224 $\pm$ 97                  | <b>3586<math>\pm</math>50</b>  | 2548 $\pm$ 308                 | 854 $\pm$ 218  | 33 $\pm$ 1     | 48 $\pm$ 10    |
| 40. Reach-wall               | 3063 $\pm$ 41                  | 2747 $\pm$ 263                 | <b>3447<math>\pm</math>180</b> | 2330 $\pm$ 273                 | 1602 $\pm$ 167 | 2906 $\pm$ 263 | 3509 $\pm$ 46  |
| 41. Shelf-place              | <b>3041<math>\pm</math>76</b>  | 878 $\pm$ 70                   | 838 $\pm$ 105                  | 899 $\pm$ 36                   | 69 $\pm$ 35    | 0 $\pm$ 0      | 1 $\pm$ 0      |
| 42. Sweep-into               | 2756 $\pm$ 79                  | 3962 $\pm$ 140                 | <b>4061<math>\pm</math>91</b>  | 3095 $\pm$ 422                 | 879 $\pm$ 157  | 238 $\pm$ 43   | 207 $\pm$ 45   |
| 43. Sweep                    | 2902 $\pm$ 59                  | 2976 $\pm$ 139                 | <b>3251<math>\pm</math>110</b> | 1640 $\pm$ 421                 | 325 $\pm$ 62   | 65 $\pm$ 8     | 83 $\pm$ 12    |
| 44. Window-open              | 2684 $\pm$ 13                  | 4142 $\pm$ 51                  | 4125 $\pm$ 87                  | <b>4225<math>\pm</math>31</b>  | 710 $\pm$ 62   | 471 $\pm$ 30   | 795 $\pm$ 116  |
| 45. Window-close             | 2828 $\pm$ 112                 | 4392 $\pm$ 39                  | 4397 $\pm$ 28                  | <b>4406<math>\pm</math>49</b>  | 710 $\pm$ 128  | 928 $\pm$ 36   | 1152 $\pm$ 96  |
| <b>Train mean</b>            | <b>2961<math>\pm</math>149</b> | 2797 $\pm$ 212                 | 2879 $\pm$ 201                 | 2685 $\pm$ 154                 | 766 $\pm$ 352  | 719 $\pm$ 63   | 779 $\pm$ 171  |
| 46. Bin-picking              | <b>2993<math>\pm</math>138</b> | 84 $\pm$ 48                    | 133 $\pm$ 38                   | 104 $\pm$ 35                   | 20 $\pm$ 9     | 20 $\pm$ 6     | 15 $\pm$ 1     |
| 47. Box-close                | <b>2844<math>\pm</math>133</b> | 159 $\pm$ 28                   | 255 $\pm$ 78                   | 145 $\pm$ 19                   | 231 $\pm$ 72   | 248 $\pm$ 20   | 209 $\pm$ 34   |
| 48. Hand-insert              | <b>2708<math>\pm</math>238</b> | 221 $\pm$ 41                   | 258 $\pm$ 67                   | 273 $\pm$ 111                  | 118 $\pm$ 89   | 82 $\pm$ 63    | 124 $\pm$ 102  |
| 49. Door-lock                | <b>2960<math>\pm</math>335</b> | 2048 $\pm$ 106                 | 1901 $\pm$ 747                 | 1565 $\pm$ 227                 | 1659 $\pm$ 184 | 1692 $\pm$ 338 | 1589 $\pm$ 374 |
| 50. Door-unlock              | <b>2962<math>\pm</math>51</b>  | 1844 $\pm$ 222                 | 1952 $\pm$ 206                 | 1763 $\pm$ 264                 | 787 $\pm$ 217  | 944 $\pm$ 167  | 1219 $\pm$ 339 |
| <b>Test mean</b>             | <b>2912<math>\pm</math>105</b> | 871 $\pm$ 117                  | 900 $\pm$ 226                  | 770 $\pm$ 140                  | 563 $\pm$ 60   | 597 $\pm$ 154  | 631 $\pm$ 203  |



Table 11: A list of all of the Meta-World tasks and a description of each task.

| Task                      | Language instructions                                     |
|---------------------------|-----------------------------------------------------------|
| assembly                  | pick up a nut and place it onto a peg                     |
| basketball                | pick the basketball and place at the goal point           |
| button-press-topdown      | push the button down to the goal point                    |
| button-press-topdown-wall | bypass a wall and press a button from the top             |
| button-press              | press a button                                            |
| button-press-wall         | bypass a wall and press a button                          |
| coffee-button             | push a button on the coffee machine                       |
| coffee-pull               | place cup away                                            |
| coffee-push               | push cup to the goal point                                |
| dial-turn                 | rotate a dial 180 degrees                                 |
| disassemble               | pick a nut out of a peg                                   |
| door-close                | push the door to the goal point                           |
| door-open                 | pull the door to the goal point                           |
| drawer-close              | push the drawer to the goal point                         |
| drawer-open               | pull the drawer to the goal point                         |
| faucet-open               | rotate the faucet counter-clockwise                       |
| faucet-close              | rotate the faucet clockwise                               |
| hammer                    | push to the goal point with hammer                        |
| handle-press-side         | press a handle down sideways                              |
| handle-press              | press a handle down                                       |
| handle-pull-side          | pull a handle up sideways                                 |
| handle-pull               | pull a handle up                                          |
| lever-pull                | pull the lever to the goal point                          |
| peg-insert-side           | insert the peg to the goal point                          |
| pick-place-wall           | pick a puck, bypass a wall and place the puck             |
| pick-out-of-hole          | pick up a puck from a hole                                |
| reach                     | reach the goal point                                      |
| push-back                 | push the puck back to the goal point                      |
| push                      | push the puck to the goal point                           |
| pick-place                | pick the puck and place at the goal point                 |
| plate-slide               | push the plate to the goal point                          |
| plate-slide-side          | push the plate left to the goal point                     |
| plate-slide-back          | push the plate back to the goal point                     |
| plate-slide-back-side     | push the plate right to the goal point                    |
| peg-unplug-side           | pull a peg sideways to the goal point                     |
| soccer                    | push a ball to the goal point                             |
| stick-push                | grasp a stick and push a box using the stick              |
| stick-pull                | grasp a stick and pull a box with the stick               |
| push-wall                 | bypass a wall and push a puck to a goal                   |
| reach-wall                | bypass a wall and reach a goal                            |
| shelf-place               | pick the puck and place on shelf at the goal point        |
| sweep-into                | sweep the puck into the box                               |
| sweep                     | sweep the puck off the table                              |
| window-open               | push the window to the goal point                         |
| window-close              | push the window to the goal point                         |
| bin-picking               | grasp the puck from one bin and place it into another bin |
| box-close                 | grasp the cover and close the box with it                 |
| hand-insert               | insert the gripper into a hole                            |
| door-lock                 | rotate the lock clockwise                                 |
| door-unlock               | rotate the lock counter-clockwise                         |

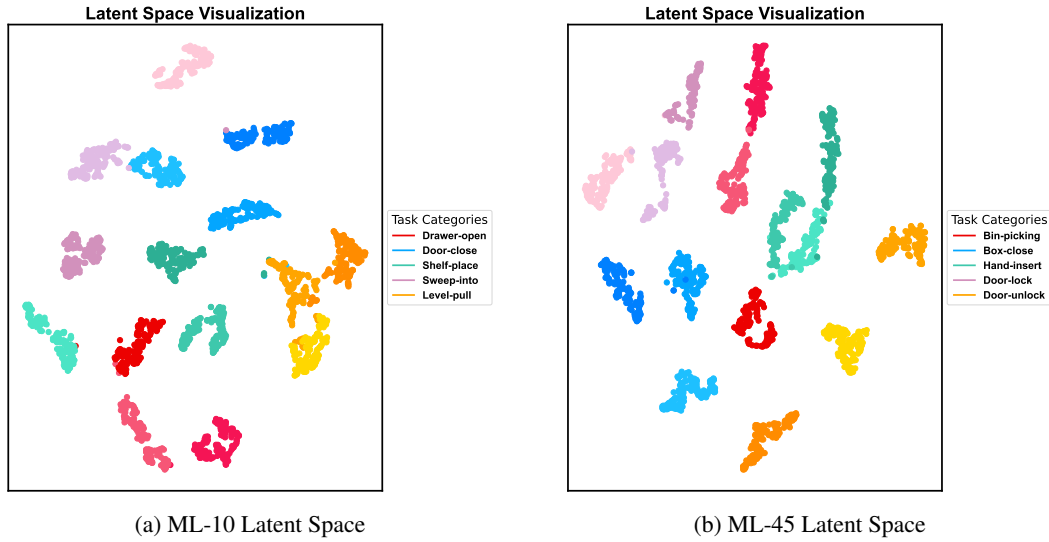

Figure 6: **Latent Space Visualization.** The t-SNE visualization of the learned task representation space for the ML-10 testing tasks is presented. We sampled three tasks from each task category of the test tasks, with each color scheme representing a different task category. Each point in the visualization corresponds to a task representation vector extracted from transitions and is color-coded according to the task properties.
